# Supplementary material for: Microtubule Dynamics Plays a Vital Role in Plant Adaptation and Tolerance to Salt Stress
Source: MDPI journal article supplement (doi:10.3390/ijms22115957), 2021-05-31
Supplement: s1 [file s1]

Table 1. Primers used for qRT-PCR.

| Gene                       | Primer Name     | Sequence (5'→3')              |
|----------------------------|-----------------|-------------------------------|
| AT4G13940 (SAHH1)          | AT4G13940-qRT-F | 5'-TGTCACCAAGAGCAAGTTCG-3'    |
|                            | AT4G13940-qRT-R | 5'-TCCAACATCACCATATCCACAG-3'  |
| AT3G52930 (FBA8)           | AT3G52930-qRT-F | 5'-AAGACATGGGCAGGTAAAGAG-3'   |
|                            | AT3G52930-qRT-R | 5'-CGAGTGTGGCTTCAGAGTTAG-3'   |
| AT2G47470 (PDIL2-1)        | AT2G47470-qRT-F | 5'-AAATCACTCGCTCCACATAC-3'    |
|                            | AT2G47470-qRT-R | 5'-ACTCCATATTTCTCGCCAAGG-3'   |
| AT1G21750 (PDIL1-1)        | AT1G21750-qRT-F | 5'-ACCAAAGCGACTCAAGTGTAG-3'   |
|                            | AT1G21750-qRT-R | 5'-GTCCTGTCTCCTTCGTAAACC-3'   |
| AT5G62700 (TUB3)           | AT5G62700-qRT-F | 5'-AAGGAAGCTGAGAACTGTGAC-3'   |
|                            | AT5G62700-qRT-R | 5'-CATGCGATCTGGGTACTCTTC-3'   |
| AT5G44340 (TUB4)           | AT5G44340-qRT-F | 5'-GCTGACGAGTGTATGTTTTG-3'    |
|                            | AT5G44340-qRT-R | 5'-AGGGAAACGAAGACAGCAAG-3'    |
| AT2G29550 (TUB7)           | AT2G29550-qRT-F | 5'-GGGCTAAAGGTCCTACTACTG-3'   |
|                            | AT2G29550-qRT-R | 5'-AAGGCAGTCACAGTTCTCAG-3'    |
| AT4G20890 (TUB9)           | AT4G20890-qRT-F | 5'-TTCCTCGTGCTGTTCTTATGG-3'   |
|                            | AT4G20890-qRT-R | 5'-TTTCGCCCAGTTATTCCCAG-3'    |
| AT5G09810 (ACT7)           | AT5G09810-qRT-F | 5'-GAATGGTGAAGGCTGGTTTTG-3'   |
|                            | AT5G09810-qRT-R | 5'-AGCATCTTTCTGACCCATACC-3'   |
| AT5G59880 (ADF3)           | AT5G59880-qRT-F | 5'-ACAGCAAGAGTGAGAAGCAAG-3'   |
|                            | AT5G59880-qRT-R | 5'-CGACCTGAATTCCGTCTAGTTC-3'  |
| AT4G34050 (CCoA-OMT1)      | AT4G34050-qRT-F | 5'-CTGGCTATGGATGTCAACAGAG-3'  |
|                            | AT4G34050-qRT-R | 5'-ATCAAGAACGGGAAGAGCAG-3'    |
| AT4G20260 (PCAP1)          | AT4G20260-qRT-F | 5'-CCGGTCACGTTTCATATTCGAG-3'  |
|                            | AT4G20260-qRT-R | 5'-CACTTGTTTCCTTCGGTTTTGG-3'  |
| AT4G10480 (NAC $\alpha$ 4) | AT4G10480-qRT-F | 5'-GAGGATGTGAAAGATGGAGACG-3'  |
|                            | AT4G10480-qRT-R | 5'-TCTCGTTCTACTTTGCTTGG-3'    |
| AT3G62030 (CYP20-3)        | AT3G62030-qRT-F | 5'-GAGAAGTTGTGCCTAAAACCG-3'   |
|                            | AT3G62030-qRT-R | 5'-GGAACCCTTGTACCCGTATTTTC-3' |
| AT4G05320 (UBQ10)          | AT4G05320-qRT-F | 5'-TGGCATCAACTTTCATTGGA-3'    |
|                            | AT4G05320-qRT-R | 5'-ATGTTGCTCTCCGCTTCTGT-3'    |
